# Supplementary material for: Machine learning can differentiate venom toxins from other proteins having non-toxic physiological functions
Source: PeerJ journal article supplement (doi:10.7717/peerj-cs.90), 2016-10-10

### Supplementary Figure 3: Toxclassifier tests and comparisons to other tools, details

Figure S3/A Displays comparison of *Accuracy (ACC)*, *Balance Accuracy (B.ACC)*, *Negative Predictive Value (NPV)* and *Specificity (SPEC)* metrics for all test datasets and all tested annotation models (Naive-BLAST showed in blue, OneBLAST in red, ClanTox animal toxin prediction server in orange and ToxClassifier in green).

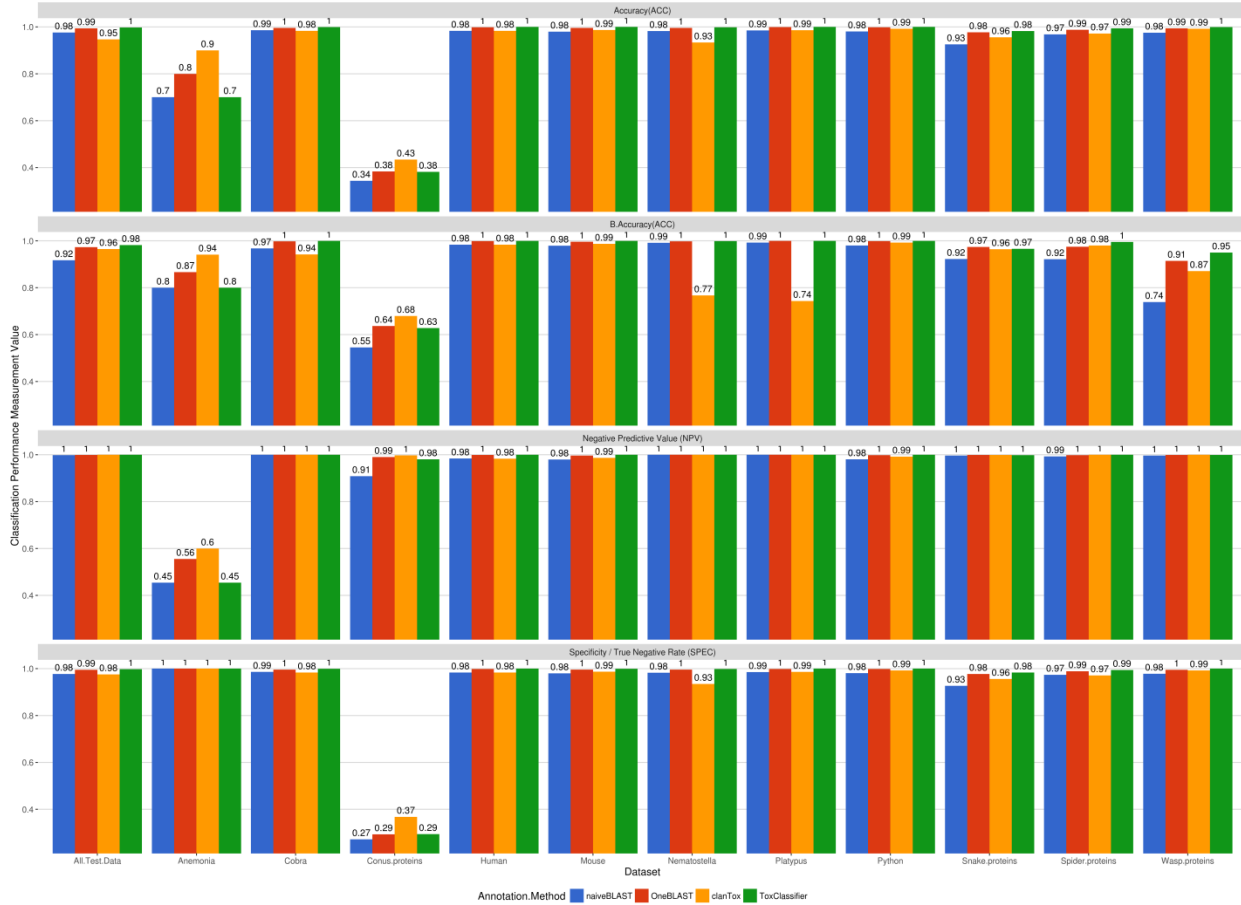

Figure S3/B Shows comparison of *F1-Value (F1)*, *MCC score (MCC)*, *Positive Prediction Value (PPV)* and *Sensitivity (SENS)* metrics for all test datasets and all tested annotation models (Naive-BLAST showed in blue, OneBLAST in red, ClanTox animal toxin prediction server in orange and ToxClassifier in green).

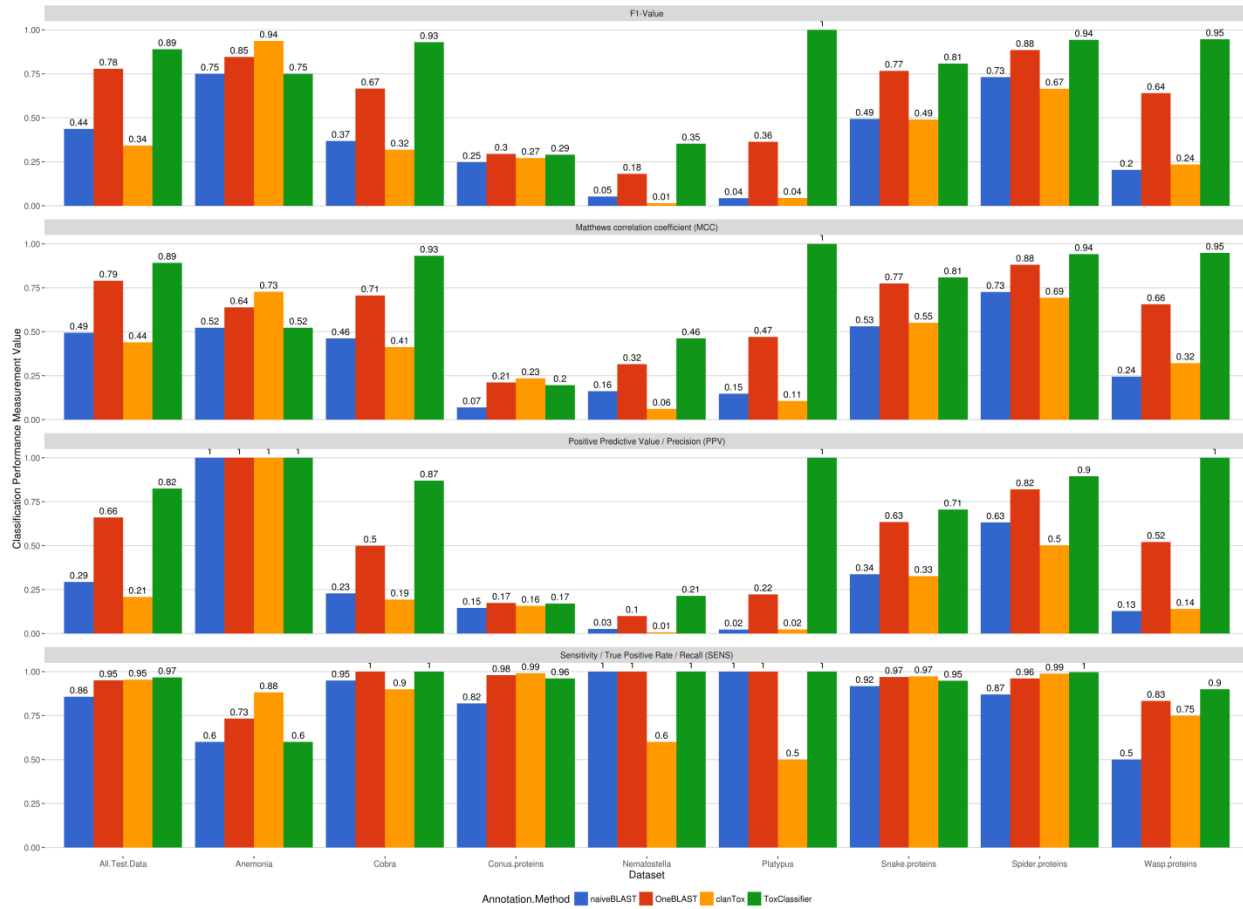

Supplement: Supplementary_Figure_3.pdf [file Supplementary_Figure_3.pdf]
